# Supplementary material for: Regulatory Interactions between Androgens, Hoxb5, and TGFβSignaling in Murine Lung Development
Source: Hindawi journal article supplement (doi:10.1155/2013/320249), 2013-01-01
Supplement: f1 [file 320249.f1.zip]

Archive with 3 entries (3 files):
- Sup.Fig.1.pptx
- Sup.Fig.2.pptx
- Sup.Fig.3.pptx
